# 1 Antenatal care attendance, intermittent preventive treatment 2 in pregnancy and knowledge on malaria: A cross sectional 3 study in a government and a private district Hospitals 4

5 Short title: Antenatal care, IPTp and malaria: A cross sectional study

## 6 Authors affiliation and contributions

| Order | Author                               | Email                                             | Contribution                                 |
|-------|--------------------------------------|---------------------------------------------------|----------------------------------------------|
| 1     | *Charity Ahiabor <sup>1,3,4</sup>    | cahiabor@atu.edu.gh<br>cahiabor@noguchi.ug.edu.gh | Investigation,<br>Original Draft,<br>Review. |
| 2     | David Courtin <sup>2,3</sup>         | david.courtin@ird.fr                              | Supervision, Funding<br>Acquisition, Review. |
| 3     | William Anyan <sup>3</sup>           | WAnyan@noguchi.ug.edu.gh                          | Review                                       |
| 4     | Atikatou Mama <sup>2</sup>           | matika1be@yahoo.fr                                | Investigation                                |
| 5     | Naa Adjeley<br>Frempong <sup>3</sup> | NTawiah@noguchi.ug.edu.gh                         | Investigation                                |
| 6     | Kwadwo A. Kusi <sup>3</sup>          | AKusi@noguchi.ug.edu.gh                           | Investigation, Review                        |
| 7     | Michael F. Ofori <sup>3</sup>        | MOfori@noguchi.ug.edu.gh                          | Supervision                                  |
| 8     | Bright Adu <sup>3</sup>              | badu@noguchi.ug.edu.gh                            | Investigation                                |
| 9     | Bernard W. Lawson <sup>4</sup>       | bwalterlawson@yahoo.com                           | Supervision, Review                          |
| 10    | Abraham K. Anang <sup>3</sup>        | Aanang@noguchi.ug.edu.gh                          | Supervision, Funding<br>Acquisition          |
| 11    | *Nicaise T. Ndam <sup>2</sup>        | nicaise.ndam@ird.fr                               | Supervision, Funding<br>Acquisition.         |

7  
8 Affiliation: Department, Institution, City, State, Country

- 9 1. Science Laboratory Technology Department, Accra Technical University, Accra Ghana
- 10 2. MERIT, Institut de Recherche pour le Developement (IRD), Université de Paris, France
- 11 3. Noguchi Memorial Institute for Medical Research, University of Ghana. Accra, Ghana
- 12 4. TAB, Kwame Nkrumah University of Science and Technology, Kumasi, Ghana

13  
14 Corresponding authors: [cahiabor@atu.edu.gh](mailto:cahiabor@atu.edu.gh)(CA), [nicaise.ndam@ird.fr](mailto:nicaise.ndam@ird.fr)(NTN)

## 15 **Abstract**

16 Ghana has made significant strides in maternal healthcare under the National Health Insurance  
17 Scheme, but more effort is required to achieve the Sustainable Development Goal 3.1 target of  
18 <70 deaths/100,000 live births from the current 308 deaths/100,000. This study sought to  
19 investigate knowledge about ANC, ANC attendance, knowledge about malaria and IPTp among  
20 pregnant women, visiting a government Hospital in Mafi-Adidome (a rural community) and a  
21 private Hospital in Battor-Dugame (a rural-urban community) in the Volta region (a high malaria  
22 endemic area in Ghana).

23 A total of 1295 consenting pregnant women participated in the study. Information on  
24 sociodemographic characteristics, knowledge about ANC, IPTp and knowledge about malaria  
25 were collected by questionnaire. Chi-square tests were used to compare proportions of variables  
26 across the two study sites.

27 Higher proportion (70.8%) of participants accessing Battor Catholic Hospital showed adequate  
28 knowledge about ANC than 38.1% in Adidome Government Hospital ( $X^2(7) = 105.11$ ;  $p < 0.001$ ).  
29 Also, higher numbers (46.6%) in Battor Catholic Hospital showed adequate knowledge on the  
30 timing for IPTp administration than 21.1% in Adidome Government Hospital ( $X^2(2) = 83.37$ ;  
31  $p < 0.001$ ). Although knowledge about malaria was generally low (0–33.3%) at both health centres,  
32 high proportions of participants (>80%) possess and use mosquito bed nets for malaria prevention.  
33 A lower proportion (46.6%) of participants in Battor Catholic Hospital made the WHO  
34 recommended 4-7 visits compared to 50.2% participants in Adidome Government Hospital.

35 Age, marital status, employment and education influenced utilization of antenatal and delivery  
36 services. More sensitization on the importance of ANC and hospital delivery is needed in the study  
37 areas.

38 **Keywords:** Antenatal care, IPTp, Malaria.

## 39 **Introduction**

40 Maternal morbidity and pregnancy-related complications are a major health concern in developing  
41 countries. According to World Health Organisation (WHO) estimations, approximately eight  
42 hundred (800) women die each day from pregnancy and childbirth complications (1). Even though  
43 there is evidence of effective interventions which are available at reasonable cost for the prevention  
44 and treatment of life-threatening maternal complications, many women continue to die through  
45 pregnancy and childbirth-related complications, especially in rural areas (2) due generally to  
46 delays in seeking healthcare.

47 In 2003, the Government of Ghana introduced the Ghana National Health Insurance Scheme  
48 (NHIS); a social intervention program intended to provide equitable access and financial coverage  
49 for basic health care services (3,4). A maternal health policy implemented under the NHIS permits  
50 free registration for pregnant women and free access to antenatal care (ANC) and delivery service  
51 as well as three months post-delivery care. To be registered onto the NHIS, a pregnant woman will  
52 need to present proof of pregnancy such as current antenatal card, pregnancy test result endorsed  
53 by a doctor or midwife or an ultrasound scan report at her own cost.

54 Though Ghana has seen significant improvement in maternal healthcare under the NHIS (5,6),  
55 more effort is required to achieve the Sustainable Development Goal (SDG) 3.1 which proposes a  
56 maternal mortality ratio less than 70 maternal deaths per 100,000 live births by 2030. Delay in  
57 identifying pregnancy related complications has been reported as a major cause of maternal  
58 morbidity and mortality, especially in rural areas (7,8). Key challenges to addressing this issue  
59 include breaking barriers to accessing critical health services, addressing inadequate financial  
60 capabilities of families or mothers, proximity to the health facility, education and other  
61 sociocultural factors. According to Apanga *et al.* in 2018 (9), ‘a lack of medical and laboratory  
62 equipment and inadequate knowledge about the benefits of antenatal care are a setback to the  
63 provision of effective and quality maternal care in the Upper East region of Ghana’. In order to  
64 improve on the quality of antenatal care and to reduce the risk of still birth and other pregnancy  
65 complications the WHO also reviewed its initial recommended four antenatal visits to eight (1).  
66 These new guidelines seek to ensure healthy pregnancy period and effective transition to positive  
67 labour and childbirth. Regardless of these initiatives, some women still fail to complete the WHO  
68 recommended ANC visits (10), despite having good knowledge about ANC services.

69 Pregnant women in Ghana are expected to deliver in a hospital facility supervised by a skilled birth  
70 attendant, however, reports show low utilization of such services. According to Ganle *et al.* in  
71 2019 (11), the factors influencing utilization include distance to the health facility, making at least  
72 four antenatal visits and registration for NHIS among others. Manyeh *et al.* in 2017 (12) also  
73 identified sociodemographic determinants of age, educational level, parity and economic status as  
74 some of the factors influencing delivery at Hospital facilities. There is limited data on how the  
75 local women in north and central Tongu perceive safe pregnancy and how they react to  
76 complications associated with pregnancy.

77 In areas of moderate to high transmission of malaria, the WHO recommended a package of  
78 interventions for control which include the promotion and use of insecticide treated nets (ITNs),  
79 the administration of intermittent preventive treatment with sulfadoxine-pyrimethamine (IPTp-SP)  
80 as part of antenatal care and appropriate case management through prompt and effective treatment  
81 of malaria in pregnancy.

82 Mafi-Adidome and Battor-Dugame are two district capitals in the Volta region that are endemic  
83 for malaria due to their proximity to the Volta Lake. Located within each district capital is a health  
84 facility namely Adidome Government Hospital (AGH); and Battor Catholic Hospital (BCH) which  
85 is privately owned and managed by the Accra Archdiocese of the Catholic Church under the office  
86 of the Metropolitan Archbishop of Accra. Even though these Hospitals are NHIS accredited,  
87 patronage for antenatal care and delivery services are generally low, particularly on non-market  
88 days when transport services are not readily available.

89 Ghana is a beneficiary of the ‘Roll Back Malaria’ program; a WHO initiative instituted as part of  
90 measures to reduce morbidity due to malaria by increasing the availability, coverage and usage of

91 insecticide-treated mosquito nets (ITNs). There is limited information on the knowledge about  
92 malaria among the inhabitants and the use of such preventive measures in the study areas.

### 93 **Research question**

94 What is effect of the knowledge of antenatal care (ANC) and malaria, intermittent preventive  
95 treatment in pregnancy (IPTp) and mosquito bed net (ITN) use among pregnant women at district  
96 Hospital in malaria endemic community to the attainment of SDG 3.1?

97 The **aim** of this study, therefore, was to investigate the ANC attendance, knowledge about ANC  
98 and knowledge about malaria and IPTp among pregnant women at two district Hospitals  
99 (government and private) in rural malaria endemic communities.

100 The objectives were to:

- 101 1. Evaluate knowledge of the importance of ANC, knowledge on malaria and IPTp among  
102 pregnant women visiting AGH and BCH.
- 103 2. Estimate ANC attendance, IPTp-SP doses administered and ITN use at the two health  
104 centres.

## 105 **Methods**

### 106 **Study area and participant recruitment**

107 Mafi-Adidome (Central Tongu District capital) and Battor-Dugame (North Tongu District capital)  
108 share a common boundary, hence, there is movement of people, goods and services between them.

109 Battor-Dugame has a densely populated semi-urban structure with moderate social amenities  
110 compared to Mafi-Adidome which has scattered settlements with fewer amenities. The population  
111 of the Central Tongu District, according to the 2010 population and housing census, was 59,411  
112 consisting of 53.2% females and 46.8% males. The general fertility rate is 94.9 births per 1000  
113 women aged 15-49 years (13). The population of the North Tongu District was 89,777, consisting

114 of 52.7% females and 46.3% males. The general fertility rate was 84.4 per 1000 women aged 15-  
115 49 (14).

116 Adidome Government Hospital (AGH) is the main referral centre within the Central Tongu  
117 District. The Hospital, though relatively small with limited modern healthcare infrastructure, offers  
118 general healthcare services. Its catchment area, however, extends well beyond the Mafi-Adidome  
119 Township and includes neighbouring towns and small communities such as Mepe, Volo, Mafi-  
120 Kumase, Bakpa, Battor etc. The Hospital encourages all patients to the facility to subscribe to the  
121 NHIS because of the general inability of the people to pay for the full cost of treatment. Other  
122 smaller privately owned clinics and CHPS (Community-Health and Planning Services)  
123 compounds are located within the district offering certain categories of healthcare.

124 Battor Catholic Hospital (BCH) is also the main referral centre in the North Tongu District. The  
125 Hospital offers specialised healthcare services and has facility for training Resident Doctors and  
126 House Officers. It is a much bigger Hospital compared to AGH in functionality and is also NHIS  
127 accredited. The immediate catchment population is about 41,437 inhabitants (14). BCH also  
128 receives patients from adjoining towns and communities such as Mepe, Osudoku, Ada East and  
129 West, Volo, Abutia, Mafi-Adidome etc. Patients to the facility are likely to pay a bit more for  
130 similar service in AGH. Other small clinics and CHPS compounds are sited within the North  
131 Tongu District.

### 132 **Ethics approval and consent to participate.**

133 Pregnant women visiting these two health facilities for antenatal care and for delivery from  
134 November 2016 to March 2019 were recruited after informed consent was obtained. The objectives  
135 of the study were explained to each participant and was presented with a written consent form for

136 their signature or thumb print. An interpreter was engaged to explain the contents of the consent  
137 form to participants who could not read and write.

138 Ethical approval for the study was obtained from the Institutional Review Board of the Noguchi  
139 Memorial Institute for Medical Research (NMIMR-IRB CPN 071/15-16 amend. 2017) and the  
140 Ethical Review Committee of the Ghana Health Service (GHS-ERC 06/06/16).

## 141 **Data capture and Analysis**

142 Information on age, gravidity status, residence, marital status, educational level, occupation and  
143 knowledge on malaria, prevention and risks during pregnancy were obtained using a structured  
144 questionnaire and analysed with STATA. Information on malaria infection status at ANC was  
145 obtained from participant's own account during questionnaire interview. At delivery, malaria  
146 infection statuses were obtained from hospital records in participant's ANC booklets. Total ANC  
147 attendance was also obtained from ANC booklets. For associations, the various variables/factors  
148 were compared with choice of facility using Chi-square tests. Where assumptions for Chi-square  
149 fail (frequencies <5), Fisher's exact tests were used. Differences in means of continuous variables  
150 were tested between facilities using t-tests and where requirements for t-tests failed, particularly  
151 normality of the data, Wilcoxon Rank Sum tests were used. The p-value threshold for significance  
152 in the analysis was 0.05.

## 153 **Availability of data and materials**

154 Data will be made available upon request.

## 155 **Competing interests**

156 There are no competing interests.

## 157 **Funding**

158 Institute of Research and Development (IRD)

## 159 Results

160 A total of 1,295 consenting pregnant women, comprising 752 from AGH and 543 from BCH were  
161 recruited. Eight hundred and thirty-one (831) was during first ANC visit and 464 during delivery.  
162 Of the 831 ANC participants, 451 were from AGH and 380 from BCH while the 464 delivery  
163 participants consisted of 301 from AGH and 163 from BCH.

### 164 Socio-demographic characteristics

165 The mean ages were 25.9(±6.5) years at AGH and 27.4(±6.0) years at BCH with the majority  
166 within the ranges of 20-29 and 30-39 years, respectively (Table 1). Chi-square test showed  
167 statistically significant differences in age across the health facilities ( $X^2(3) = 17.89$ ;  $p < 0.001$ ).  
168 Whereas most pregnant women accessed ANC clinics close to their residence, a small proportion  
169 of them i.e., 1.1% from Adidome were captured accessing BCH for their first ANC while 7.8%  
170 from Battor were captured at Adidome. The study also found more pregnant women from ‘other  
171 communities’ accessing BCH (45.8%) than AGH (5.1%) for the first ANC visit. Majority of  
172 participants with basic education i.e. Primary and Junior High School accessed AGH than BCH,  
173 while majority of participants with secondary and tertiary education, accessed BCH than AGH  
174 (Table 1). Mean gestation at first ANC consultation were 14.6(±7.3) weeks at AGH and 16.4(±6.9)  
175 weeks at BCH ( $t = 3.50$ ,  $p < .001$ ). A higher proportion of the multigravidae was observed at the two  
176 health centres.

177 **Table 1: Socio-demographics characteristics of study participants**

|             | Health facility, N (%) |            | Test statistic   | P-value   |
|-------------|------------------------|------------|------------------|-----------|
|             | AGH                    | BCH        |                  |           |
| Age (years) |                        |            | $X^2(3) = 17.89$ | $< 0.001$ |
| <20         | 91 (20.2)              | 37 (9.7)   |                  |           |
| 20 – 29     | 228 (50.6)             | 209 (55.0) |                  |           |
| 30 – 39     | 124 (27.5)             | 124 (32.6) |                  |           |
| 40+         | 8 (1.8)                | 10 (2.6)   |                  |           |



|                                |             |             |                 |        |
|--------------------------------|-------------|-------------|-----------------|--------|
| Mean (SD)                      | 25.9(6.5)   | 27.4(6.0)   | t = -3.46       | <0.001 |
| Age at first pregnancy (years) |             |             | t =-3.52        | <0.001 |
| Mean (SD)                      | 20.8 (3.7)  | 21.8 (4.1)  |                 |        |
| Residence                      |             |             | $X^2(2)=612.99$ | <0.001 |
| Adidome                        | 393 (87.1)  | 4 (1.1)     |                 |        |
| Battor                         | 35 (7.8)    | 202 (53.2)  |                 |        |
| Other                          | 23 (5.1)    | 174 (45.8)  |                 |        |
| Marital status                 |             |             | $X^2(2)=83.92$  | <0.001 |
| Married                        | 301 (66.7)  | 320 (84.2)  |                 |        |
| Single                         | 147 (32.6)  | 34 (9.0)    |                 |        |
| Cohabiting                     | 3 (0.7)     | 26 (6.8)    |                 |        |
| Highest formal education       |             |             | $X^2(4)=37.96$  | <0.001 |
| None                           | 46 (10.2)   | 43 (11.3)   |                 |        |
| Primary                        | 111 (24.6)  | 78 (20.5)   |                 |        |
| JHS                            | 239 (53.0)  | 165 (43.4)  |                 |        |
| SHS                            | 48 (10.6)   | 53 (14.0)   |                 |        |
| Tertiary                       | 7 (1.6)     | 41 (10.8)   |                 |        |
| No. of children                |             |             | $X^2(5)=5.45$   | 0.364  |
| 0                              | 154 (34.2)  | 118 (31.1)  |                 |        |
| 1                              | 112 (24.8)  | 110 (29.0)  |                 |        |
| 2                              | 73 (16.2)   | 67 (17.6)   |                 |        |
| 3                              | 50 (11.1)   | 48 (12.6)   |                 |        |
| 4                              | 35 (7.8)    | 22 (5.8)    |                 |        |
| 5+                             | 27 (6.0)    | 15 (4.0)    |                 |        |
| Mean (SD)*                     | 1.6 (1.6)   | 1.5 (1.5)   |                 |        |
| Gravida                        |             |             | $X^2(1)=1.95$   | 0.163  |
| Primigravidae                  | 141 (31.3)  | 102 (26.8)  |                 |        |
| Multigravidae                  | 310 (68.7)  | 278 (73.2)  |                 |        |
| Gestation at ANC (weeks)       |             |             | t =3.50         | <0.001 |
| Mean (SD)                      | 14.6 (7.3)  | 16.4 (6.9)  |                 |        |
| Total                          | 451 (100.0) | 380 (100.0) |                 |        |

178 \*Test on differences carried out on only the categorical version of the variable.

179  $X^2(df)$  = Chi-square (degrees of freedom), t = Student t-test.

180 JHS = Junior High School, SHS = Senior High School

181 Chi-square analysis showed a significant association between formal education and choice of  
 182 health facility ( $X^2(4) = 37.96$ ;  $p < 0.001$ ). More of the married participants compared to the single  
 183 and cohabiting assessed ANC at BCH than AGH with a statistically significant difference observed  
 184 in marital status and choice of health facility ( $X^2(2) = 83.92$ ;  $p < 0.001$ ). Also, higher proportion of  
 185 multigravidae reported at BCH while higher proportion of the primigravidae were observed at  
 186 AGH.

## 187 **Accessibility of health facility**

188 Even though a total of 65.2% of respondents did not consider the hospital far from their houses,  
 189 only 12.4% of them got to their respective health facilities by foot (ie 19.5% at BCH and 6.4% at  
 190 AGH;  $X^2(9) = 154.15$ ;  $p < 0.001$ ). Those who reached the hospital by motorbike (Okada) constituted  
 191 50.1% (ie 63.6% at AGH and 34% at BCH). Only a small proportion accessed Hospital by  
 192 boat/canoe (ie 6.9% at AGH and 1.8% at BCH). Travel time to Hospital showed majority of the  
 193 study participants spent between 10 - 29 minutes from home to the hospital. This comprised of  
 194 45% at AGH and 47.6% at BCH. Study participants who spend more than one hour to get to  
 195 Hospital comprise 3.3% at AGH and 5.5% at BCH (Table 2). Concerning cost of transportation,  
 196 majority of participants at the time of study spend between 1-5 cedis to get to the Hospital facility  
 197 (ie 59.4% at AGH and 46.3% at BCH;  $X^2(5) = 78.52$ ;  $p < 0.001$ ).

198 **Table 2: Accessibility of health facility**

| ANC facility                                  | N (%)      |            |            | Test statistic<br>P-value        |
|-----------------------------------------------|------------|------------|------------|----------------------------------|
|                                               | Adidome    | Battor     | Total      |                                  |
| Do you consider the hospital far from house?  |            |            |            | $X^2(1) = 7.84$<br>$p = 0.005$   |
| No                                            | 275 (61.0) | 267 (70.3) | 542 (65.2) |                                  |
| Yes                                           | 176 (39.0) | 113 (29.7) | 289 (34.8) |                                  |
| Average travel time to health facility (mins) |            |            |            | $X^2(3) = 72.49$<br>$p < 0.001$  |
| 5 – 9                                         | 87 (19.3)  | 140 (36.8) | 227 (27.3) |                                  |
| 10 – 29                                       | 203 (45.0) | 181 (47.6) | 384 (46.2) |                                  |
| 30 – 60                                       | 146 (32.4) | 38 (10.0)  | 184 (22.1) |                                  |
| >60                                           | 15 (3.3)   | 21 (5.5)   | 36 (4.3)   |                                  |
| Mode of transport to health facility          |            |            |            | $X^2(9) = 154.15$<br>$p < 0.001$ |
| Walking                                       | 29 (6.4)   | 74 (19.5)  | 103 (12.4) |                                  |
| Taxi                                          | 75 (16.6)  | 167 (44.0) | 242 (29.1) |                                  |
| Bus                                           | 30 (6.7)   | 8 (2.1)    | 38 (4.6)   |                                  |
| Boat/Canoe                                    | 31 (6.9)   | 7 (1.8)    | 38 (4.6)   |                                  |
| Motorbike/Okada                               | 287 (63.6) | 129 (34.0) | 416 (50.1) |                                  |
| Other                                         | 30 (6.7)   | 10 (2.6)   | 40 (4.8)   |                                  |
| Cost of transport to health facility (Cedis)  |            |            |            | $X^2(5) = 78.52$<br>$p < 0.001$  |
| None                                          | 18 (3.99)  | 30 (7.9)   | 48 (5.8)   |                                  |
| <1                                            | 9 (2.0)    | 68 (17.9)  | 77 (9.3)   |                                  |
| 1 – 5                                         | 268 (59.4) | 176 (46.3) | 444 (53.4) |                                  |

|         |             |             |             |
|---------|-------------|-------------|-------------|
| 6 – 10  | 127 (28.2)  | 82 (21.6)   | 209 (25.2)  |
| 11 – 15 | 25 (5.5)    | 13 (3.4)    | 38 (4.6)    |
| >15     | 4 (0.9)     | 11 (2.9)    | 15 (1.8)    |
| Total   | 451 (100.0) | 380 (100.0) | 831 (100.0) |

199  $\chi^2$ (df) = Chi-square (degrees of freedom)

200

## 201 Knowledge about antenatal care and IPTp

202 During an assessment of participants’ knowledge on the importance of antenatal care, study  
 203 participants were asked, ‘Why did you decide to visit the health centre?’ to which their responses  
 204 include, ‘Feeling sick’, ‘Knowing the importance of antenatal care for the baby only’ and  
 205 ‘Knowing the importance of antenatal care for the mother and for the baby’ (Table 3).

206 **Table 3: Knowledge of importance of ANC and timing of IPTp**

|                                    | ANC Health facility, N (%) |             | Test statistic     | P-value |
|------------------------------------|----------------------------|-------------|--------------------|---------|
|                                    | AGH                        | BCH         |                    |         |
| Reason for attending ANC**         |                            |             | $\chi^2(7)=105.11$ | <0.001  |
| Feeling sick                       | 116 (25.7)                 | 66 (17.4)   |                    |         |
| ANC is important for mother        | 93 (20.6)                  | 40 (10.5)   |                    |         |
| ANC is important for baby          | 73 (16.2)                  | 9 (2.4)     |                    |         |
| ANC is important for mother & baby | 172 (38.1)                 | 269 (70.8)  |                    |         |
| Timing of IPTp during pregnancy    |                            |             | $\chi^2(2)=83.37$  | <0.001  |
| After first trimester exclusively  | 95 (21.1)                  | 177 (46.6)  |                    |         |
| Anytime during the pregnancy       | 2 (0.4)                    | 17 (4.5)    |                    |         |
| Don't know                         | 354 (78.5)                 | 186 (49.0)  |                    |         |
| Total                              | 451 (100.0)                | 380 (100.0) |                    |         |

207 \*\*Multiple responses allowed and so totals for variable may exceed totals below.

208  $\chi^2$ (df) = Chi-square (degrees of freedom), IPTp = Intermittent Preventive Treatment in pregnancy

209 A statistically significant association was observed between ‘Reason for attending ANC’ and  
 210 choice of health centre ( $\chi^2(7)=105.11$ ;  $p<0.001$ ). Proportions of participants who responded ‘ANC  
 211 was important for both mother and baby’ were 38.1% at AGH and 70.8% at BCH. The proportion  
 212 of participants who responded ‘feeling sick’ were 25.7% at AGH compared to 17.4% at BCH.  
 213 Similarly, when the question about the timing of IPTp administration was posed, 46.6% of ANC  
 214 participants at BCH responded ‘after the first trimester exclusively’ as against 21.1% of ANC

215 participants at AGH who responded same. Some study participants who responded, ‘don’t know’  
216 were 78.5% at AGH compared to 49.0% at BCH (Table 3).

## 217 **ANC attendance and IPTp administration**

218 Table 4 is a summary of information collated from the ANC booklets of participants at delivery.  
219 It includes information on total ANC visits made, doses of intermittent preventive treatment with  
220 sulfadoxine-pyrimethamine (IPTp-SP) administered, complications and emergency visits during  
221 the prenatal period. The number of ANC visits were categorized into participants who made less  
222 than four (<4) visits, between 4-7 visits and more than seven (>7) visits. Results show majority of  
223 participants at both health facilities made between 4-7 ANC visits with no statistically significant  
224 association observed between ANC attendance and health facility ( $X^2(2) = 1.17$ ;  $p = 0.558$ ).

225 Findings on timing of first ANC visit showed 51.5% of participants reported at AGH and 45%  
226 reported at BCH in the first trimester ( $X^2(2) = 1.67$ ;  $p = 0.433$ ). Only 7.6% in AGH and 9.3% in  
227 BCH reported in the third trimester. When the question about timing of IPTp administration was  
228 posed, higher proportions of study participants, such as 52.5% reporting at AGH and 50.9%  
229 reporting at BCH responded, ‘after the first trimester exclusively’ ( $X^2(2) = 11.97$ ;  $p = 0.003$ ). A lower  
230 proportion of participants ie 41.2% at AGH and 33.1% at BCH however, responded ‘don’t know’.  
231 Some study participants did not take IPTp-SP during the pregnancy period and these were 9% at  
232 AGH and 2.5% at BCH (Table 4). Only one person gave a reason for not receiving IPTp and that  
233 is, reporting late for the first ANC in the 38<sup>th</sup> week of pregnancy. Very low percentages were  
234 recorded for complications and emergency visits at both health facilities (AGH and BCH) with p-  
235 values of 0.026 and 0.099 respectively across the health facilities.

236 **Table 4: ANC attendance and IPTp-SP doses administered.**

---

Delivery Health facility,  
N (%)

---

|                                           | AGH         | BCH         | Test statistic    | P-value            |
|-------------------------------------------|-------------|-------------|-------------------|--------------------|
| Trimester at first ANC visit              |             |             | $\chi^2(2)=1.67$  | 0.433              |
| 1st trimester                             | 136 (51.5)  | 68 (45.0)   |                   |                    |
| 2nd trimester                             | 108 (40.9)  | 69 (45.7)   |                   |                    |
| 3rd trimester                             | 20 (7.6)    | 14 (9.3)    |                   |                    |
| Total                                     | 264 (100.0) | 151 (100.0) |                   |                    |
| Total no. of ANC visits                   |             |             | $\chi^2(2)=1.17$  | 0.558              |
| <4                                        | 70 (23.3)   | 36 (22.1)   |                   |                    |
| 4 –7                                      | 151 (50.2)  | 76 (46.6)   |                   |                    |
| 8+                                        | 80 (26.6)   | 51 (31.3)   |                   |                    |
| IPTp-SP given during current pregnancy    |             |             | $\chi^2(1)=7.20$  | 0.007              |
| No                                        | 27 (9.0)    | 4 (2.5)     |                   |                    |
| Yes                                       | 274 (91.0)  | 159 (97.6)  |                   |                    |
| No. of IPTp-SP doses received             |             |             | $\chi^2(4)=7.87$  | 0.096              |
| 1                                         | 43 (15.7)   | 20 (12.6)   |                   |                    |
| 2                                         | 49 (17.9)   | 27 (17.0)   |                   |                    |
| 3                                         | 111 (40.5)  | 52 (32.7)   |                   |                    |
| 4                                         | 48 (17.5)   | 36 (22.6)   |                   |                    |
| 5+                                        | 23 (8.4)    | 24 (15.1)   |                   |                    |
| Median (IQR)                              | 3.0 (2.0)   | 3.0 (2.0)   | $z=-2.17$         | 0.030 <sup>r</sup> |
| When to take IPTp during pregnancy        |             |             | $\chi^2(2)=11.97$ | 0.003              |
| After first trimester exclusively         | 158 (52.5)  | 83 (50.9)   |                   |                    |
| Anytime during the pregnancy              | 19 (6.3)    | 26 (16.0)   |                   |                    |
| Don't know                                | 124 (41.2)  | 54 (33.1)   |                   |                    |
| Emergency visits during current pregnancy |             |             | $\chi^2(1)=2.71$  | 0.099              |
| No                                        | 271 (90.0)  | 154 (94.5)  |                   |                    |
| Yes                                       | 30 (10.0)   | 9 (5.5)     |                   |                    |
| Complications during pregnancy            |             |             | $\chi^2(1)=4.96$  | 0.026              |
| No                                        | 278 (92.4)  | 140 (85.9)  |                   |                    |
| Yes                                       | 23 (7.6)    | 23 (14.1)   |                   |                    |
| Total                                     | 301 (100.0) | 163 (100.0) |                   |                    |

237  $\chi^2(df) =$  Chi-square (degrees of freedom), r = Wilcoxon Rank Sum test p-value

238

## 239 Knowledge about malaria, symptoms, risks and prevention

240 A score of participants' knowledge about malaria, risks and prevention revealed a generally 'low  
 241 knowledge' i.e., scores between 0-33.33% on the subject. Despite this observation however, a  
 242 higher proportion of participants from BCH got 'Medium' and 'High' scores compared to  
 243 participants from AGH. Among ANC participants, 55.2% from AGH and 21.3% from BCH scored  
 244 'low knowledge' (0-33.33%). A similar trend was observed at delivery ie 48.2% accessing AGH

245 and 28.2% accessing BCH with a statistically significant correlation observed between knowledge  
 246 about malaria and attendance at the health facilities both during ANC visits ( $X^2(2) = 124.37$ ;  $p$   
 247  $< 0.001$ ) and reporting for delivery ( $X^2(2) = 26.22$ ;  $p < 0.001$ ).

248 Among ANC participants who scored ‘medium knowledge’ i.e. between 33.34–66.66%, a 69.2%  
 249 was recorded at BCH compared to 44.8% at AGH. At delivery too, a higher proportion of 53.4%  
 250 of ‘medium knowledge’ scorers was observed at BCH than at AGH (45.5%). High scoring (66.67-  
 251 100%) study participants were only observed at BCH ANC and at the delivery wards of the two  
 252 health centres, even though their numbers were low (Table 5).

253  
 254 **Table 5: Level of knowledge on malaria causes, symptoms, risks, general prevention and**  
 255 **prevention during pregnancy**

|                 | ANC Health facility, N (%) |             | Test statistic<br>P-value        | Delivery Health facility, N (%) |             | Test statistic<br>P-value       |
|-----------------|----------------------------|-------------|----------------------------------|---------------------------------|-------------|---------------------------------|
|                 | Adidome                    | Battor      |                                  | Adidome                         | Battor      |                                 |
| Knowledge level |                            |             | $X^2(2) = 124.37$<br>$p < 0.001$ |                                 |             | $X^2(2) = 26.22$<br>$p < 0.001$ |
| Low             | 246 (55.2)                 | 81 (21.3)   |                                  | 145 (48.2)                      | 46 (28.2)   |                                 |
| Medium          | 202 (44.8)                 | 263 (69.2)  |                                  | 137 (45.5)                      | 87 (53.4)   |                                 |
| High            | 0 (0.0)                    | 36 (9.5)    |                                  | 19 (6.3)                        | 30 (18.4)   |                                 |
| Total           | 451 (100.0)                | 380 (100.0) |                                  | 301 (100.0)                     | 163 (100.0) |                                 |
| Mean (SD)       | 33.2 (9.8)                 | 46.6 (16.6) |                                  | 34.8 (20.0)                     | 48.5 (21.1) |                                 |

256 Knowledge level: Low = 0-33.33%, Medium = 33.34-66.66%, High = 66.67-100%

## 257 Malaria and mosquito bed net usage

258 Information provided via responses to questionnaire and records from participant’s ANC booklets  
 259 show a small proportion of participants both at ANC and at delivery had malaria during the study  
 260 period. Among the ANC participants, 2.0% at AGH and 4.5% at BCH reported of malaria infection  
 261 while 16.9% at AGH and 8.0% at BCH of delivery participants have records of malaria infection  
 262 (Table 6). No confirmatory tests were however, carried out for 66.7% at AGH and 58.8% at BCH.  
 263 Majority of participants possessed mosquito bed nets and a relatively high proportion of ANC

264 participants i.e., 67.3% at AGH and 75.1% at BCH ( $p < 0.001$ ) compared to delivery participants ie  
265 51.1% at AGH and 39.7% at BCH ( $p = 0.039$ ) used the nets regularly.

**Table 6: Knowledge about Malaria and mosquito bed net usage among study participants**

|                                                                     | ANC Health facility, N (%) |             | Test statistic<br>P-value | Delivery Health facility, N (%) |             | Test statistic<br>P-value |
|---------------------------------------------------------------------|----------------------------|-------------|---------------------------|---------------------------------|-------------|---------------------------|
|                                                                     | Adidome                    | Battor      |                           | Adidome                         | Battor      |                           |
| Had malaria during current pregnancy                                |                            |             | $X^2(2)=7.62$             |                                 |             | $X^2(1)=7.15$             |
| No                                                                  | 425 (94.2)                 | 357 (94.0)  | p=0.022                   | 250 (83.1)                      | 150 (92.0)  | p=0.007                   |
| Yes                                                                 | 9 (2.0)                    | 17 (4.5)    |                           | 51 (16.9)                       | 13 (8.0)    |                           |
| Don't know                                                          | 17 (3.8)                   | 6 (1.6)     |                           | NA                              | NA          |                           |
| <i>For those who had malaria,</i><br>Malaria confirmatory test done |                            |             |                           |                                 |             |                           |
| No                                                                  | 6 (66.7)                   | 10 (58.8)   |                           | NA                              | NA          |                           |
| Yes                                                                 | 3 (33.3)                   | 7 (41.2)    |                           |                                 |             |                           |
| Have mosquito bed net                                               |                            |             | $X^2(1)=0.15$             |                                 |             | $X^2(1)=1.08$             |
| No                                                                  | 29 (6.4)                   | 22 (5.8)    | p=0.701                   | 31 (10.3)                       | 12 (7.4)    | p=0.298                   |
| Yes                                                                 | 422 (93.6)                 | 358 (94.2)  |                           | 270 (89.7)                      | 151 (92.6)  |                           |
| No. of bed nets                                                     |                            |             | $X^2(4)=28.30$            |                                 |             | $X^2(4)=6.05$             |
| 1                                                                   | 225 (53.3)                 | 243 (67.9)  | p<0.001                   | 158 (58.5)                      | 93 (61.6)   | p=0.167 <sup>f</sup>      |
| 2                                                                   | 140 (33.2)                 | 62 (17.3)   |                           | 70 (25.9)                       | 45 (29.8)   |                           |
| 3                                                                   | 46 (10.9)                  | 36 (10.1)   |                           | 29 (10.7)                       | 6 (4.0)     |                           |
| 4                                                                   | 5 (1.2)                    | 7 (2.0)     |                           | 7 (2.6)                         | 4 (2.7)     |                           |
| 5+                                                                  | 6 (1.4)                    | 10 (2.8)    |                           | 6 (2.2)                         | 3 (2.0)     |                           |
| Bed net use frequency*                                              |                            |             | $X^2(3)=16.05$            |                                 |             | $X^2(3)=7.97$             |
| Always                                                              | 284 (67.3)                 | 269 (75.1)  | p<0.001 <sup>f</sup>      | 138 (51.1)                      | 60 (39.7)   | p=0.039                   |
| Sometimes                                                           | 131 (31.0)                 | 73 (20.4)   |                           | 123 (45.6)                      | 81 (53.6)   |                           |
| Seldom                                                              | 5 (1.2)                    | 8 (2.3)     |                           | 6 (2.2)                         | 9 (6.0)     |                           |
| Source of bed nets**                                                |                            |             |                           |                                 |             | $X^2(12)=28.49$           |
| ANC (hospital)                                                      |                            |             |                           | 258 (95.6)                      | 130 (86.1)  | p=0.005                   |
| Pharmacy                                                            |                            |             |                           | 3 (1.1)                         | 1 (0.7)     |                           |
| Market                                                              | NA                         | NA          |                           | 14 (5.2)                        | 5 (3.3)     |                           |
| Friend/Family                                                       |                            |             |                           | 4 (1.5)                         | 6 (4.0)     |                           |
| House distribution                                                  |                            |             |                           | 3 (1.1)                         | 12 (8.0)    |                           |
| Other sources                                                       |                            |             |                           | 17 (6.3)                        | 9 (6.0)     |                           |
| Slept under bed net previous night                                  |                            |             | $X^2(1)=1.93$             |                                 |             | $X^2(1)=3.37$             |
| No                                                                  | 68 (15.1)                  | 71 (18.7)   | p=0.165                   | 132 (43.9)                      | 86 (52.8)   | p=0.066                   |
| Yes                                                                 | 383 (84.9)                 | 309 (81.3)  |                           | 169 (56.2)                      | 77 (47.2)   |                           |
| Total                                                               | 451 (100.0)                | 380 (100.0) |                           | 301 (100.0)                     | 163 (100.0) |                           |

267

\*Missing values accounted for but not shown. \*\*Multiple responses allowed and so totals for variable may exceed totals below.

268

NA = Not Applicable (was not part of questionnaire).  $X^2(df)$  = Chi-square (degrees of freedom), f = Fisher's exact p-value.

269



## 270 **Discussion**

271 Maternal age was observed to be a factor in ANC service utilization. Age at first ANC visit was  
272 mainly within 20–39 years and similar patterns were observed in the two health centres (Table 1).  
273 This follows the Ghana Health Service (GHS) recommendation which advocates 20 – 35 years as  
274 the peak reproductive years with minimum complications. This age category conforms to another  
275 study by Manyeh *et al.*, (12) where the average age of a group of first time mothers in a rural  
276 community in southern Ghana was observed to be 23 years. Yaya *et al.*,(15) also reported the  
277 average age for ANC attendance in Ghana at 30.6 ( $\pm 7.1$ ) years.

278 Marital status was also observed to influence ANC service utilization, since high proportions of  
279 the married participants were observed at the two health facilities (Table 1). A similar finding was  
280 reported by Sakeah *et al.*, (16) where marital status was associated with ANC attendance. Pregnant  
281 women who were single, widowed or divorced were less likely to make the recommended number  
282 of ANC visits (17). Pregnant women living in urban communities and supportive spouses in a  
283 marriage union may have a higher solvency and this may account for the higher numbers of  
284 married ANC participants observed in BCH where they were likely to pay a higher fee for a similar  
285 service in AGH.

286 The high proportion of Primary and Junior school leavers observed (Table 1) points to a high rate  
287 of school dropout in the two study areas. However, Battor-Dugame being a semi-urban area has  
288 more educational facilities compared to Mafi-Adidome hence the higher proportion of SHS and  
289 tertiary graduates observed at BCH. According to Muyunda *et al.*, (18) women with higher  
290 education were more likely to make at least four ANC visits showing that education was associated  
291 with optimal ANC attendance. The high school dropout in the study areas, however, may account

292 for the generally low ANC attendance. Even so, the higher numbers of basic school leavers  
293 observed in AGH may reflect a lower cost of ANC and delivery care offered at that facility.

294 Collectively, study participants at BCH appear better informed about the importance of ANC and  
295 timing of IPTp administration (Table 3). In spite of this observation, a lower proportion of 45.0%  
296 of BCH participants compared to 51.5% of participants at AGH initiated ANC visits in the first  
297 trimester in accordance with WHO recommendations. This observation can be compared to the  
298 finding of other studies in some rural communities in the southern and northern parts of Ghana  
299 (8,12) where only 50% of the study participants initiated ANC visits in the first and second  
300 trimesters, a trend which may have implications for maternal morbidity and mortality. Around  
301 50% of the pregnant women made the recommended 4-7 ANC visits which is also comparable to  
302 the observation from other parts of Ghana (8,16,20).

303 Intermittent preventive treatment of malaria in pregnancy (IPTp) with sulfadoxine-pyrimethamine  
304 (SP) has been the WHO strategy for preventing malaria in pregnancy. This policy on IPTp-SP  
305 recommends uptake of at least three doses of IPTp-SP; each dose to be administered at a scheduled  
306 ANC visit. Results of this study show a median of three doses of IPTp-SP at each health facility  
307 (Table 4) showing compliance with the WHO recommendation of September 2012 for protection  
308 against malaria in pregnancy.

309 Pregnancy schools concept adopted by the Ghana Health Service has been an innovative and  
310 effective way to equip pregnant women with relevant knowledge pertaining to maternal and child  
311 health. In the study areas, these pregnancy schools are conducted during ANC visits with some  
312 success achieved especially in knowledge of timing of IPTp-SP among participants in AGH. At  
313 ANC enrolment, only 21.1% of study participants knew IPTp must be administered in the first  
314 trimester. However, at delivery the percentage of participants increased to 52.5% and this speaks

315 to the continuous education given out at these pregnancy schools. The high percentage of  
316 participants who received IPTp-SP ie 91.0% in AGH and 97.6% in BCH is indicative of good  
317 coverage of IPTp administration at the two study sites.

318 Ownership and use of mosquito bed nets is one of WHO interventions towards reducing malaria  
319 transmission and morbidity within communities. Aside IPTp-SP, the high proportion of  
320 participants who possessed and used mosquito bed nets regularly pointed to the success of the Roll  
321 Back Malaria program in the study areas. The evidence of this could be due to the low prevalence  
322 of malaria and pregnancy related complications observed among the study participants at both  
323 study sites. The generally low level of knowledge about malaria observed was not seen to influence  
324 the prevalences observed.

## 325 **Conclusion**

326 Higher proportion of participants below 20 years accessed Adidome Government Hospital while  
327 the older age groups of participants accessed Battor Catholic Hospital for obstetric care. Also,  
328 more married study participants were observed at Battor Catholic Hospital, whereas more of the  
329 single study participants were observed at Adidome. Majority of participants with basic (Primary,  
330 Junior High School) education accessed Adidome Government Hospital, whereas majority of  
331 participants with secondary and tertiary education, accessed Battor Catholic Hospital. Knowledge  
332 about the importance of ANC care was low especially in Adidome, however, knowledge about  
333 malaria was generally low in both study areas. Despite the NHIS intervention, attendance for  
334 delivery service was also generally low in both study sites, accessibility was observed to be a factor  
335 limiting attendance to Hospital. All study participants were NHIS subscribers, therefore, health  
336 insurance was not a factor limiting attendance. There is the need for more education on the

337 significant impact of adequate ANC attendance on healthy pregnancy and use of Hospital delivery  
338 services to reduce maternal mortality in the study areas.

## 339 **Acknowledgements**

340 Sincere thanks and gratitude to IRD (Institut de Recherche pour le Développement), funders of  
341 this study and to Mr. Tony Godi (School of Public Health, University of Ghana) for the analysis  
342 of the data. Our deepest appreciation to the staff of Battor Catholic Hospital and the staff of  
343 Adidome Government Hospital for all their assistance.

## 344 **References**

- 345 1. WHO. Global Recommendations for Routine Antenatal Care. World Heal Organ  
346 [Internet]. 2018;10(1):1–10. Available from:  
347 [https://apps.who.int/iris/bitstream/handle/10665/259947/WHO-RHR-18.02-](https://apps.who.int/iris/bitstream/handle/10665/259947/WHO-RHR-18.02-eng.pdf;jsessionid=854322A336E0C697360A233CD18F48BC?sequence=1)  
348 [eng.pdf;jsessionid=854322A336E0C697360A233CD18F48BC?sequence=1](https://apps.who.int/iris/bitstream/handle/10665/259947/WHO-RHR-18.02-eng.pdf;jsessionid=854322A336E0C697360A233CD18F48BC?sequence=1)
- 349 2. Ngwenya S. Severe preeclampsia and eclampsia: Incidence, complications, and perinatal  
350 outcomes at a low-resource setting, mpilo central hospital, bulawayo, Zimbabwe. *Int J*  
351 *Womens Health*. 2017;9:353–7.
- 352 3. Okoroh J, Essoun S, Seddoh A, Harris H, Weissman JS, Dsane-Selby L, et al. Evaluating  
353 the impact of the national health insurance scheme of Ghana on out of pocket  
354 expenditures: A systematic review. *BMC Health Serv Res*. 2018;18(1).
- 355 4. Wang H, Otoo N, Dsane-Selby L. Ghana National Health Insurance Scheme: Improving  
356 Financial Sustainability Based on Expenditure Review. Ghana National Health Insurance  
357 Scheme: Improving Financial Sustainability Based on Expenditure Review. 2017.

- 358 5. Dalinjong PA, Wang AY, Homer CSE. The implementation of the free maternal health  
359 policy in rural Northern Ghana: Synthesised results and lessons learnt. *BMC Res Notes*  
360 [Internet]. 2018;11(1):1–6. Available from: <https://doi.org/10.1186/s13104-018-3452-0>
- 361 6. Twum P, Qi J, Aurelie KK, Xu L. Effectiveness of a free maternal healthcare programme  
362 under the National Health Insurance Scheme on skilled care: Evidence from a cross-  
363 sectional study in two districts in Ghana. *BMJ Open*. 2018;8(11):1–8.
- 364 7. Sageer R, Kongnyuy E, Adebimpe WO, Omosehin O, Ogunsola EA, Sanni B. Causes and  
365 contributory factors of maternal mortality: Evidence from maternal and perinatal death  
366 surveillance and response in Ogun state, Southwest Nigeria. *BMC Pregnancy Childbirth*.  
367 2019;19(1):1–8.
- 368 8. Sumankuuro J, Crockett J, Wang S. The use of antenatal care in two rural districts of  
369 Upper West Region, Ghana. *PLoS One*. 2017;12(9):1–18.
- 370 9. Apanga PA, Awoonor-Williams JK. Maternal Death in Rural Ghana: A Case Study in the  
371 Upper East Region of Ghana. *Front Public Heal*. 2018;6(April):1–6.
- 372 10. Afaya A, Azongo TB, Dzomeku VM, Afaya RA, Salia SM, Adataro P, et al. Women’s  
373 knowledge and its associated factors regarding optimum utilisation of antenatal care in  
374 rural Ghana: A crosssectional study. *PLoS One* [Internet]. 2020;15(7 July):1–19.  
375 Available from: <http://dx.doi.org/10.1371/journal.pone.0234575>
- 376 11. Ganle JK, Kombet ML, Baatiema L. Factors influencing the use of supervised delivery  
377 services in Garu-Tempene District, Ghana. *BMC Pregnancy Childbirth*. 2019;19(1):1–11.
- 378 12. Manyeh AK, Akpakli DE, Kukula V, Ekey RA, Narh-Bana S, Adjei A, et al. Socio-

- 379 demographic determinants of skilled birth attendant at delivery in rural southern Ghana.  
380 BMC Res Notes. 2017;10(1):1–7.
- 381 13. Ghana Statistical Service. Central Tongu District. In: 2010 Population and housing  
382 Census. 2014.
- 383 14. Ghana Statistical Service. North Tongu District. In: 2010 Population and Housing census.  
384 2014.
- 385 15. Yaya S, Da F, Wang R, Tang S, Ghose B. Maternal healthcare insurance ownership and  
386 service utilisation in Ghana: Analysis of Ghana demographic and health survey. PLoS  
387 One. 2019;14(4):1–13.
- 388 16. Sakeah E, Okawa S, Oduro AR, Shibanuma A, Ansah E, Kikuchi K, et al. Determinants of  
389 attending antenatal care at least four times in rural Ghana: analysis of a cross-sectional  
390 survey. Glob Health Action [Internet]. 2017;10(1). Available from:  
391 <https://doi.org/10.1080/16549716.2017.1291879>
- 392 17. Rurangirwa AA, Mogren I, Nyirazinyoye L, Ntaganira J, Krantz G. Determinants of poor  
393 utilization of antenatal care services among recently delivered women in Rwanda; a  
394 population based study. BMC Pregnancy Childbirth. 2017;17(1):1–10.
- 395 18. Muyunda B, Makasa M, Jacobs C, Musonda P, Michelo C. Higher Educational  
396 Attainment Associated with Optimal Antenatal Care Visits among Childbearing Women  
397 in Zambia. Front Public Heal. 2016;4(June):1–7.
- 398 19. Manyeh AK, Amu A, Williams J, Gyapong M. Factors associated with the timing of  
399 antenatal clinic attendance among first-time mothers in rural southern Ghana. BMC

400 Pregnancy Childbirth. 2020;20(1):1–7.

401 20. Boah M, Mahama AB, Ayamga EA. They receive antenatal care in health facilities, yet do

402 not deliver there: Predictors of health facility delivery by women in rural Ghana. BMC

403 Pregnancy Childbirth. 2018;18(1):1–10.

404
